# Supplementary material
Source: PubMed Central journal article supplement (PMC3770349)
Supplement: NIHMS509521-supplement-1.pdf [file NIHMS509521-supplement-1.pdf]

## Supplemental Figure S1

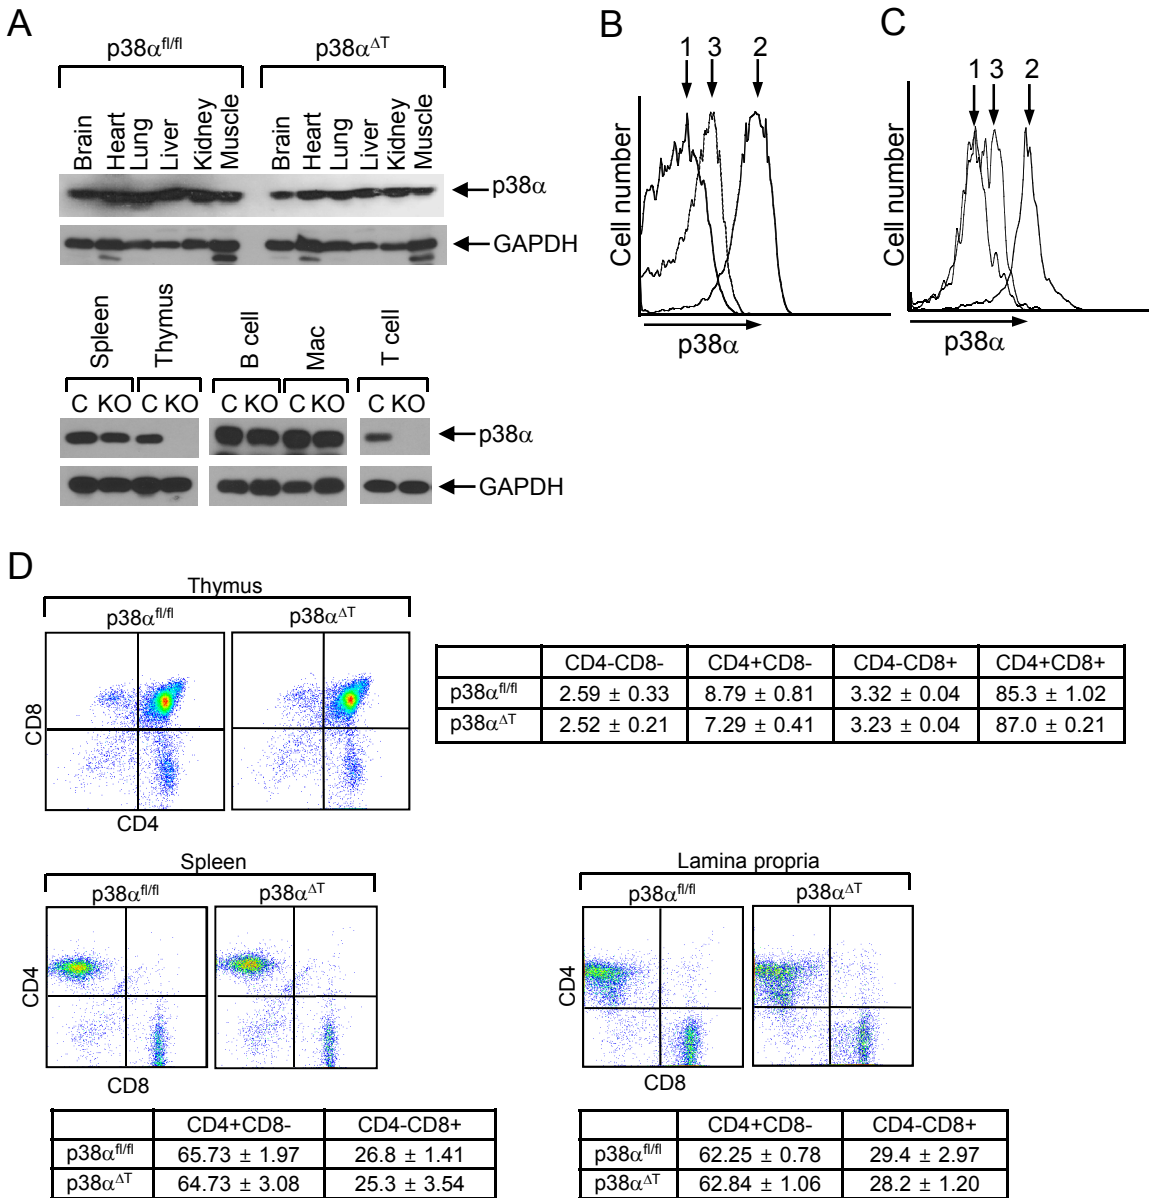

**Supplemental Figure S1.** Generation and characterization of T cell-specific p38 $\alpha$ -deficient mouse strain. (A & B) T cell-specific deletion of p38 $\alpha$ . Lysates of tissues and immune cells from control (p38 $\alpha^{fl/fl}$  or C) and T cell-specific p38 $\alpha$ -deficient (p38 $\alpha^{\Delta T}$  or KO) mice were analyzed by immunoblotting using anti-p38 $\alpha$  antibodies. Equal loading of proteins was assessed by detecting GAPDH levels (A). (B & C) LP lymphocytes were stained with anti-CD3-APC and anti-CD4-FITC (B) or mesenteric lymph node (LN) cells were stained with anti-CD11c-FITC (C) Abs. Cells were further permeabilized and stained with rabbit anti-p38 $\alpha$  followed by anti-rabbit-PE Abs. Intracellular p38 $\alpha$  was detected in CD3+CD4+ or CD11c+ cells. 1, isotype Ab control; 2, p38 $\alpha^{fl/fl}$  LP cells; 3, p38 $\alpha^{\Delta T}$  LP (in B) or p38 $\alpha^{\Delta DC}$  LN cells. (D) Subsets of T cells. Cells from the thymus, spleen, or lamina propria were obtained from p38 $\alpha^{fl/fl}$  or p38 $\alpha^{\Delta T}$  mice, and stained with fluorescein-conjugated antibodies. The proportion of CD4 and CD8 T cells in the CD3<sup>+</sup> cell population were analyzed by flow cytometry. The percentage of each subset of T cells is shown as mean  $\pm$  s.d. in the table.

## Supplemental Figure S2

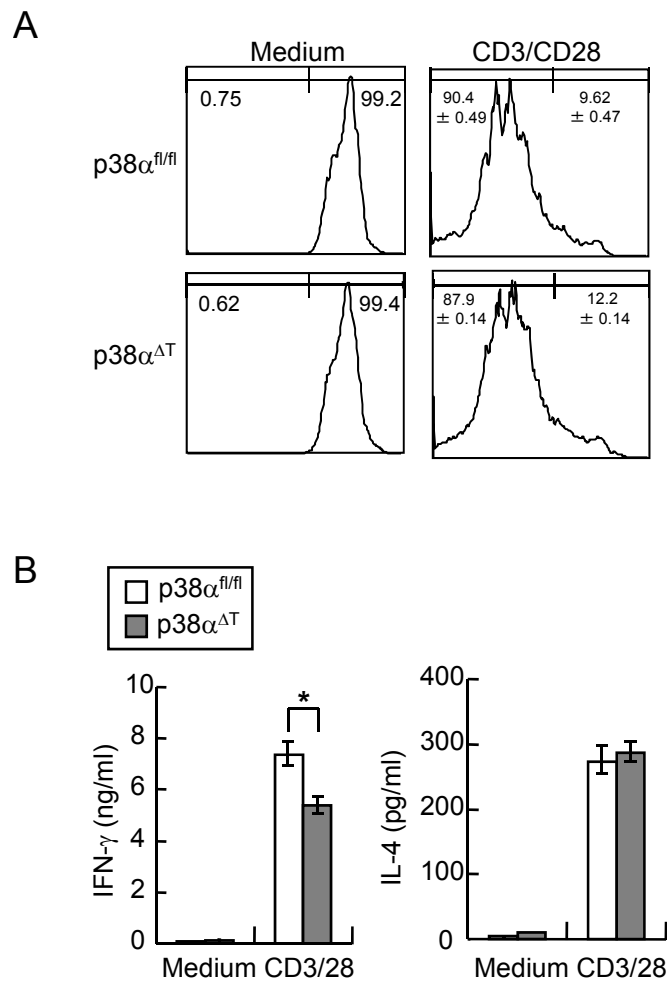

**Supplemental Figure S2.** Role of p38 $\alpha$  in T cell activation *in vitro*. T cells from the spleens of p38 $\alpha^{fl/fl}$  or p38 $\alpha^{\Delta T}$  mice were obtained. (A) Purified T cells were stained with CFSE and stimulated with medium or anti-CD3/CD28 antibodies for 3 days. Proliferation of T cells was analyzed by flow cytometry. (B) T cells were stimulated with medium or anti-CD3/CD28 antibodies, and culture supernatants were obtained. IFN- $\gamma$  and IL-4 levels in culture supernatants were measured by ELISA. \*,  $p < 0.05$ , and error bars indicate s.d.

## Supplemental Figure S3

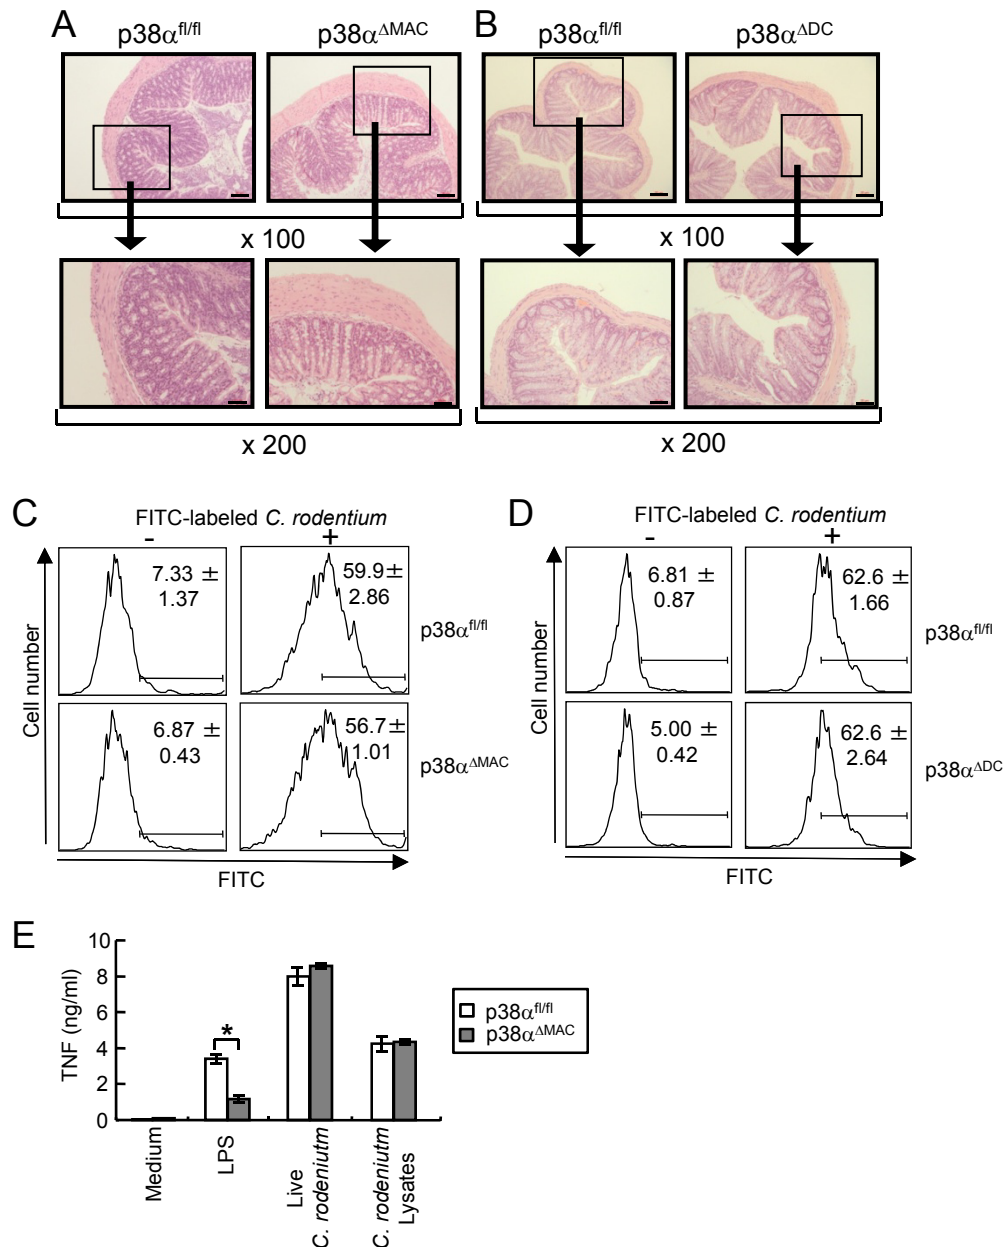

**Supplemental Figure S3.** Innate immunity is not regulated by p38 $\alpha$  in *C. rodentium* infection. (A & B) Inflammation of colon tissues in the *C. rodentium*-infected mice. Colon tissues of *C. rodentium*-infected p38 $\alpha^{fl/fl}$  or p38 $\alpha^{\Delta MAC}$  (A), or p38 $\alpha^{fl/fl}$  or p38 $\alpha^{\Delta DC}$  (B) mice were obtained after 2 weeks of infection and stained with hematoxylin and eosin. Original magnification is shown. Scale bar = 20  $\mu$ m. (C & D) Role of p38 $\alpha$  in phagocytosis of *C. rodentium*. Peritoneal macrophages from p38 $\alpha^{fl/fl}$  or p38 $\alpha^{\Delta MAC}$  mice (C), or BM-derived DCs from p38 $\alpha^{fl/fl}$  or p38 $\alpha^{\Delta DC}$  mice (D) were incubated with FITC-labeled *C. rodentium* (1 mg/ml of FITC in PBS for 15 min). Cell:bacteria=1:100. After 6 hours, cells were washed and harvested in ice-cold PBS to measure the intracellular phagocytosis of *C. rodentium*. DCs were stained with anti-CD11c-PE antibodies. (E) p38 $\alpha$  in macrophages is not involved in the host response to *C. rodentium*. Peritoneal macrophages from p38 $\alpha^{fl/fl}$  or p38 $\alpha^{\Delta MAC}$  mice were obtained and stimulated with medium, LPS (100 ng/ml), live *C. rodentium* ( $10^9$  CFU), or *C. rodentium* lysates (100  $\mu$ g/ml) for 24 hours. TNF- $\alpha$  levels in culture supernatants were measured by ELISA.

## Supplemental Figure S4

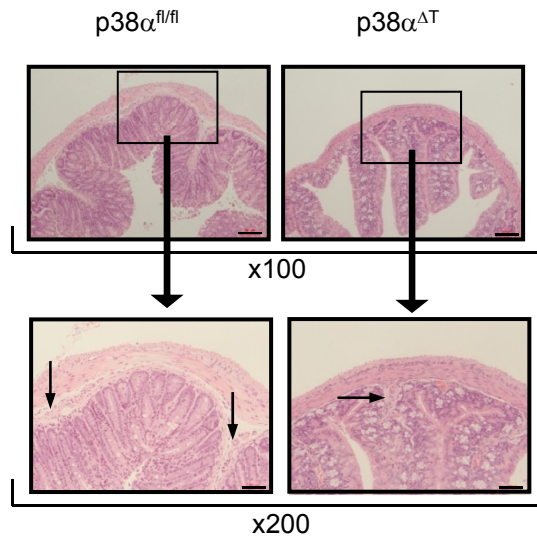

**Supplemental Figure S4.** Inflammation in *C. rodentium*-infected mice. H & E staining of colon tissues of *C. rodentium*-infected  $p38\alpha^{fl/fl}$  or  $p38\alpha^{\Delta T}$  mice. Colon segments were obtained after 2 weeks of infection. Boxed area is x200 of the original x100 magnification. Arrows in the figure indicate the infiltration of inflammatory cells. Scale bar = 20  $\mu\text{m}$ .
